# Supplementary material
Source: MDPI journal article supplement (https://www.mdpi.com/2079-6412/13/12/2062)
Supplement: s1 [file s1]

# Supplementary materials

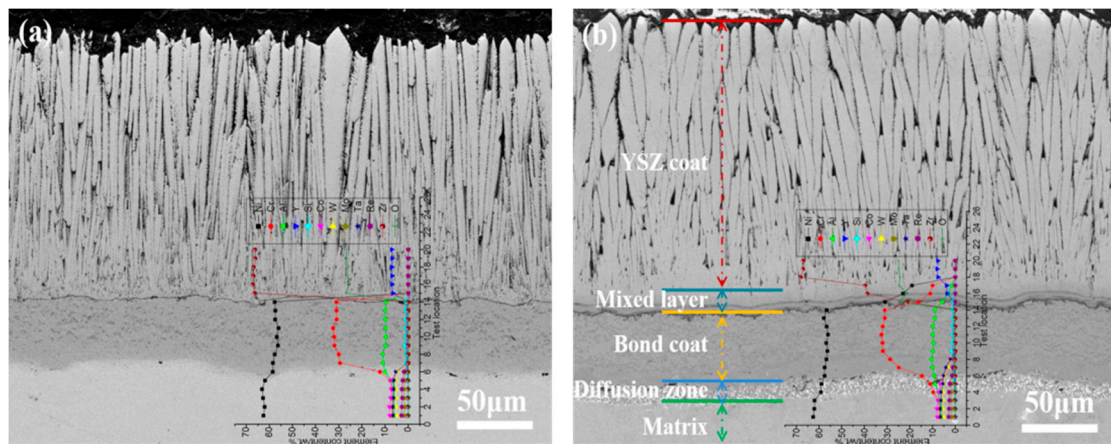

Figure S1: The mixed map by overlaying elemental composition trend on the cross-section microstructure image of the coating before and after gas thermal shock testing. (a) before gas thermal shock testing; (b) after gas thermal shock testing.
